1 **A novel mass assay to measure phosphatidylinositol-5-phosphate**  
2 **from cells and tissues**

3

4

5

6

7

8

9 Avishek Ghosh, Sanjeev Sharma, Dhananjay Shinde, Visvanathan Ramya and Padinjat Raghu

10

11 National Centre for Biological Sciences, TIFR-GKVK Campus, Bellary Road, Bangalore 560065,

12 India.

13

14 \*Correspondence: [praghu@ncbs.res.in](mailto:praghu@ncbs.res.in)

15 Tel: +91-80-23666102

16

17

18

19

20

21

22

23

24

25

26

27

## 28 Abstract

29

30 Phosphatidylinositol-5-phosphate (PI<sub>5</sub>P) is a low abundance lipid proposed to have functions in cell  
31 migration, DNA damage responses, receptor trafficking and insulin signalling in metazoans.  
32 However, studies of PI<sub>5</sub>P function are limited by the lack of scalable techniques to quantify its level  
33 from cells and tissues in multicellular organisms. Currently, PI<sub>5</sub>P measurement requires the use of  
34 radionuclide labelling approaches that are not easily applicable in tissues or *in vivo* samples. In this  
35 study, we describe a simple and reliable, non-radioactive mass assay to measure total PI<sub>5</sub>P levels  
36 from cells and tissues of *Drosophila*, a genetically tractable multicellular model. We use <sup>18</sup>O-ATP to  
37 label PI<sub>5</sub>P from tissue extracts while converting it into PI<sub>(4,5)</sub>P<sub>2</sub> using an *in vitro* kinase reaction.  
38 The product of this reaction can be selectively detected and quantified with high sensitivity using a  
39 liquid chromatography-tandem mass spectrometry platform. Further, using this method, we capture  
40 and quantify the unique acyl chain composition of PI<sub>5</sub>P from *Drosophila* cells and tissues. Finally,  
41 we demonstrate the use of this technique to quantify elevations in PI<sub>5</sub>P levels, from both *Drosophila*  
42 larval tissues and cultured cells depleted of phosphatidylinositol 5 phosphate 4-kinase (PIP<sub>4</sub>K), that  
43 metabolizes PI<sub>5</sub>P into PI<sub>(4,5)</sub>P<sub>2</sub> thus regulating its levels. Thus, we demonstrate the potential of our  
44 method to quantify PI<sub>5</sub>P levels with high sensitivity levels from cells and tissues of multicellular  
45 organisms thus accelerating understanding of PI<sub>5</sub>P functions *in vivo*.

46

47

48

49

50

51

52

53

54

55

56

57

58

59

## 60 Introduction

61 Phosphoinositides are a quantitatively minor class of glycerophospholipids, that mediate several cell  
62 biological functions that in turn can affect a wide range of physiological process. Phosphoinositides  
63 are generated by the selective phosphorylation of positions 3, 4 and 5 on the inositol headgroup of  
64 phosphatidylinositol [1]. The seven naturally occurring phosphoinositides are present in different  
65 amounts in the cell and each carries out distinct and characteristic functions within cells. Of these,  
66 the most recent phosphoinositide to be discovered was phosphatidylinositol 5-phosphate (PI<sub>5</sub>P) [2].  
67 Since, its discovery, several studies have indicated that PI<sub>5</sub>P is present at low quantities in cells and  
68 its levels change in response to external cues such as UV radiation, oxidative or osmotic stress and  
69 growth factor stimulation [3–6] and such PI<sub>5</sub>P mediated signals might regulate cellular and  
70 physiological processes in multicellular organisms. Therefore, identifying and studying enzymes that  
71 can regulate PI<sub>5</sub>P levels in higher organisms is an active area of research.

72

73 Studies with cultured mammalian cells have shown robust changes in PI<sub>5</sub>P levels upon perturbations  
74 of two classes of phosphoinositide phosphate kinase (PIP kinase) enzymes; phosphatidylinositol 5  
75 phosphate 4-kinase (PIP<sub>4</sub>K) and phosphatidylinositol 3 phosphate 5-kinase (PIKFYVE). PIP<sub>4</sub>K  
76 enzymes can phosphorylate PI<sub>5</sub>P to generate phosphatidylinositol 4,5 bisphosphate PI<sub>(4,5)</sub>P<sub>2</sub> and  
77 thus reduce PI<sub>5</sub>P levels in cells. On the other hand, PIKFYVE can synthesize PI<sub>5</sub>P directly by  
78 phosphorylating PI on the 5<sup>th</sup> position of the inositol sugar ring [7]. Alternatively, PIKFYVE can  
79 phosphorylate PI<sub>3</sub>P to produce PI<sub>(3,5)</sub>P<sub>2</sub>, which can get dephosphorylated by a 3-phosphatase to  
80 form PI<sub>5</sub>P. However, the *in vivo* identity of such a 3-phosphatase is still elusive [8]. Therefore,  
81 studying changes in PI<sub>5</sub>P levels from multicellular biological models where one or multiple PI<sub>5</sub>P  
82 regulating enzymes are manipulated, will develop a mechanistic understanding of PI<sub>5</sub>P under  
83 physiological conditions.

84

85 The quantification of phosphoinositides is typically done by one of two methods. The first involves  
86 the use of genetically encoded fluorescently tagged lipid binding domains [9]. This technique allows  
87 measurement of individual lipids that bind specifically to a protein domain at the level of a single  
88 cell with subcellular spatial resolution. In the context of PI<sub>5</sub>P quantification, the plant homeo  
89 domain (PHD) of the mammalian transcription factor, ING2 has been used in many studies [10,11].  
90 However, due to its non-specific affinity toward PI<sub>3</sub>P, it is not regarded as an ideal probe for PI<sub>5</sub>P  
91 measurements [12].

92

93 A second approach is based on the detection and quantification of PI<sub>5</sub>P by radiolabelling cells with  
94 radioactive <sup>32</sup>P ATP or <sup>3</sup>H *myo*-inositol and then separating the deacylated monophosphoinositide  
95 isomers by ion exchange chromatography [13]. While this is a powerful approach in cultured cells,  
96 practical considerations restrict its use in animals, thus reducing the scope of its applicability for *in*  
97 *vivo* analysis. Some studies have used reverse phase HPLC to separate unlabelled deacylated PIP  
98 species and detect them by mass spectrometry [14,15]. However, reproducible separation of PI<sub>5</sub>P  
99 from the far more abundant and closely migrating PI<sub>4</sub>P is a challenge. More recently, various groups  
100 working on PI<sub>5</sub>P, have adopted a radioactive mass assay to measure PI<sub>5</sub>P levels [16,17]. The  
101 radioactive PI<sub>5</sub>P-mass assay involves conversion of PI<sub>5</sub>P to PI(4,5)P<sub>2</sub> by purified PIP4K $\alpha$  using an  
102 *in vitro* reaction that uses ATP with a <sup>32</sup>P-label on its  $\gamma$ -PO<sub>4</sub><sup>3-</sup> [<sup>32</sup>P ATP]. This enables selective  
103 visualisation of the <sup>32</sup>P labelled PI(4,5)P<sub>2</sub> on a TLC plate [16]. While this technique is robust and  
104 offers good reproducibility, the disadvantage lies in the need to use radioactivity precluding the  
105 ability to handle a large number of samples at a given time and requires appropriate radiation safety  
106 facilities. A non-radioactive mass spec-based assay system, if available, can provide the advantage of  
107 avoiding potentially hazardous radiation and simultaneously offer higher sensitivity. To achieve  
108 these specific aims, we evolved the existing mass assay for PI<sub>5</sub>P levels to use a heavy Oxygen labelled  
109 ATP (<sup>18</sup>O-ATP) instead of using <sup>32</sup>P-ATP in the kinase reaction. <sup>18</sup>O is a non-radioactive stable heavy  
110 isotope of oxygen with 2 Da difference in mass from naturally occurring <sup>16</sup>O. This difference in mass  
111 allowed us to selectively monitor <sup>18</sup>O-PI(4,5)P<sub>2</sub> formed from biochemical PI<sub>5</sub>P by PIP4K $\alpha$ , from a  
112 lipid mixture containing endogenous PI(4,5)P<sub>2</sub> through the use of a liquid chromatography-tandem  
113 mass spectrometry (LC-MS/MS) based approach. In this study, we have developed a method based  
114 on this strategy to detect and measure changes in PI<sub>5</sub>P levels. Further, using the advantages of triple-  
115 quadrupole mass spectrometry, we were able to determine the levels of multiple species of PI<sub>5</sub>P, each  
116 with a unique fatty acyl chain composition.

117

## 118 **Materials and methods**

### 119 *Fly strains and stocks*

120 All experiments were performed with *Drosophila melanogaster* (hereafter referred to as *Drosophila*).  
121 Cultures were reared on standard medium containing corn flour, sugar, yeast powder and agar along  
122 with antibacterial and antifungal agents. Genetic crosses were set up with Gal4 background strains  
123 and maintained at 25°C and 50% relative humidity [18]. There was no internal illumination within  
124 the incubator and the larvae of the correct genotype was selected at the 3<sup>rd</sup> instar wandering stage



125 using morphological criteria. *Drosophila* strains used were ROR (wild type strain), *dPIP4K*<sup>29</sup>  
126 (homozygous null mutant of *dPIP4K*), *daGal4*.

127

### 128 *S2R+ cells: culturing and dsRNA treatment*

129 *Drosophila* S2R+ cells were cultured and maintained as mentioned in Gupta et. al., 2013 [19]. dsRNA  
130 treatment was performed as described in Kumari et al., 2017 [20]. Briefly,  $0.5 \times 10^6$  cells were  
131 incubated with 3.75  $\mu$ g of dsRNA for 96 hours as described in Worby et. al., 2003 [21].

132

### 133 *Western blotting*

134 Five wandering 3<sup>rd</sup> instar larvae were used for lysate preparation. They were washed in PBS and  
135 homogenised using clean plastic pestles in lysis buffer [50 mM Tris/Cl-pH 7.5, 1mM EDTA, 1mM  
136 EGTA, 1% Triton X-100, 50mM NaF, 0.27 M Sucrose, 0.1%  $\beta$ -Mercaptoethanol and freshly added  
137 protease and phosphatase inhibitors (Roche)]. Lysates were kept on ice for 15 mins following which  
138 the carcass was pelleted at 1000Xg for 15 mins at 4°C. About 75% of the lysate was transferred to a  
139 fresh tube, 6X Laemelli buffer added and samples heated at 95°C for 5 mins. Lysates of S2R+ cells  
140 were prepared by first washing the cells twice in 1 $\times$  PBS and lysed in the lysis buffer mentioned  
141 previously, Laemelli buffer was added and the sample heated at 95°C for 5 mins. Proteins were  
142 separated by SDS/PAGE and transferred onto nitrocellulose membrane using wet transfer.  
143 Membranes were blocked with 10% Blotto (in 0.1% Tween 20, 1 $\times$ TBS{TBST}) and primary antibody  
144 incubations were performed in 5% BSA in 0.1% TBST overnight at 4°C. Washes were done in TBST.  
145 Secondary antibody incubations were performed for 2 hour at room temperature after which, the  
146 membranes were visualised using ECL reagent (Biorad). Dilutions of antibodies used: 1:4000 for  
147 anti-tubulin (E7-c), (mouse) from DSHB and 1:1000 anti-Actin (Rabbit) A5060 from Sigma and  
148 1:1000 for anti-*dPIP4K* antibody (Rabbit) used was generated in the lab and described previously  
149 [19].

150

### 151 *Lipid standards*

152 diC16-PI<sub>3</sub>P – Echelon P-3016; diC16-PI<sub>5</sub>P – Echelon P-5016; Avanti 850173 | rac-16:0 PI(5)P-d<sub>5</sub>  
153 (Custom synthesised) ; 17: 0 20: 4 PI<sub>3</sub>P - Avanti LM-1900 ; 17: 0 20: 4 PI(4,5)P<sub>2</sub> - Avanti LM-1904.

154

### 155 *Lipid isolation*

156 All the lipid isolation and processing steps were adapted from Jones et. al., 2013 [16] and Clark et.  
157 al., 2011 [22]. Larvae: For each sample, five wandering 3<sup>rd</sup> instar larvae were washed, dried on a tissue  
158 paper and transferred to 0.5 ml tubes (Precellys Bertin corp. KT03961-1-203.05) containing 200 $\mu$ l

159 Phosphoinositide elution buffer [PEB: chloroform/methanol/2.4 M hydrochloric acid in a ratio of  
160 250/500/200 (vol/vol/vol)]. A Bertin homogenizer instrument, Precellys®24 (P000669-PR240-A) was  
161 used at 6000rpm for 4 cycles with 30 secs rest time on ice. The homogenate was transferred to 750µl  
162 of PEB in a 1.5 ml Eppendorf and sonicated for 2 mins. We added either 10 or 35ng of 17:0 20:4  
163 PI(4,5)P<sub>2</sub> as internal standard (in methanol) for LC-MS/MS experiments. Further, 250µl chloroform  
164 and 250µl MS-grade water was added and vortexed for 2 mins. The contents were then centrifuged  
165 for 5 mins at 1000Xg to obtain clean phase separation. The lower organic phase was washed with  
166 equal volume of lower phase wash solution [LPWS: methanol/1 M hydrochloric acid/chloroform in  
167 a ratio of 235/245/15 (vol/vol/vol)] and vortexed and phase separated. The organic phase thus  
168 obtained was dried in vacuum and stored at -20°C and processed further within 24 hours. S2R+ cells:  
169 Cells were dislodged from the dishes, transferred to 1.5 ml Eppendorf tubes and washed twice with  
170 1X Tris-buffered saline (TBS) following which 950 µl of PEB was added to the tubes. The mixture  
171 was vortexed for 2 mins following which it was sonicated in a bath sonicator for 2 mins. The rest of  
172 the procedure was identical to that described for extraction of lipids from larvae (see above).

173

#### 174 *Neomycin chromatography*

175 Glyceryl glass (controlled pore) beads were purchased from Sigma (cat. no. GG3000-200) and  
176 charged with neomycin sulfate as previously published [16] or neomycin beads were purchased from  
177 Echelon Biosciences (cat. no. P-B999). Chromatography was performed with 1-2 mg bead  
178 equivalent in slurry form on a Rotospin instrument (Tarsons, India) using buffers as described in  
179 Jones et. al., 2013.

180

#### 181 *Total Organic Phosphate measurement*

182 500 µl flow-through obtained from the phosphoinositide binding step of neomycin chromatography  
183 was used for the assay. The sample was heated till drying in a dry heat bath at 90°C in phosphate-  
184 free glass tubes (Cat# 14-962-26F). The rest of the process was followed according to Jones et. al.,  
185 2013 [16].

186

#### 187 *GST-PIP<sub>4</sub>Kα based <sup>18</sup>O-ATP mass assay*

188 Either diC16-PI<sub>5</sub>P (Echelon) (for radioactivity) or 17:0 20:4 PI<sub>3</sub>P and d<sub>5</sub>-diC16-PI<sub>5</sub>P (for LC-MS)  
189 were mixed with 20 µM Phosphatidylserine (PS) (Sigma P5660) and dried in a centrifugal vacuum  
190 concentrator. For biological samples, the PS was added to the organic phase obtained at the end of  
191 the neomycin chromatography before drying. To this, 50 µl 10 mM Tris-HCl pH 7.4 and 50 µl diethyl  
192 ether was added and the mixture was sonicated for 2 mins in a bath sonicator to form lipid micelles.

193 The tubes were centrifuged at 1000Xg to obtain a diethyl ether phase and vacuum centrifuged for 2  
194 mins to evaporate out the diethyl ether. At this time, the reaction was incubated on ice for ca. 10  
195 mins and 2X kinase assay buffer (100 mM Tris pH 7.4, 20 mM MgCl<sub>2</sub>, 140 mM KCl, and 2 mM  
196 EGTA and 1 µg equivalent GST-PIP<sub>4</sub>K enzyme-expressed and purified according to Jones et. al.,  
197 2013) was added. For the experiments with radioactivity, the 2X kinase assay buffer contained 40  
198 µM cold ATP, 5 µCi [ $\gamma$ -<sup>32</sup>P] ATP (for synthetic lipids) or 10 µCi [ $\gamma$ -<sup>32</sup>P] ATP for biological lipids.  
199 For LC-MS/MS based experiments the kinase assay buffer contained 80 µM <sup>18</sup>O-ATP (OLM-7858-  
200 20, Cambridge Isotope Laboratory).

201

202 All the assays were performed at 30°C; in the case of synthetic lipids, assays were performed for  
203 defined periods of time; in the case of biological samples, assays were performed for 16 hours unless  
204 otherwise mentioned. Reactions were stopped by adding 125 µl 2.4N HCl, 250 µl methanol and 250  
205 µl chloroform. The mixture was vortexed vigorously and spun down for 5 mins at 1000Xg to obtain  
206 clean phase separation. The lower organic phase was washed with equal volume of LPWS and  
207 vortexed and phase separated. The final organic phase obtained was processed further for either TLC  
208 or chemical derivatization to analyse the products of the reactions.

209

#### 210 *Derivatization and LC-MS/MS*

211 The organic phase obtained after lipid extraction was directly subjected to derivatization using 2 M  
212 TMS-diazomethane (Acros AC385330050), with all necessary cautions as mentioned in Sharma et  
213 al., 2019 [23] . After this, 50 µl TMS-diazomethane was added to each tube and vortexed gently for  
214 10 min. The reaction was neutralized using 10 µl of glacial acetic acid. This was followed by two post  
215 derivatization washes as described in Sharma et al., 2019 [23]. To this final extract, 90% (v/v)  
216 methanol was added to this and dried for ~2 hours in a centrifugal vacuum concentrator at 300 rpm.  
217 Next, 170 µl of methanol was added to the dried sample after which it was ready for injection.  
218 Samples were run on a hybrid triple quadrupole mass spectrometer (Sciex 6500 Q-Trap) connected  
219 to a Waters Acquity UPLC I class system. Separation was performed either on a ACQUITY UPLC  
220 Protein BEH C<sub>4</sub>, 300Å, 1.7 µm, 1 mm X 100 mm column [Product #186005590] or a 1 mm X 50  
221 mm column [Product #186005589], using a 45% to 100% acetonitrile in water (with 0.1% formic  
222 acid) gradient over 10 mins or 4 mins. Detailed MS/MS and LC conditions are presented in tabular  
223 format in the next section.

224

225

226

227 *LC conditions and Mass Spectrometry parameters*

228 Gradient conditions:

229

230

231

| Time (in mins)<br>1 mm X 100 mm column | Time (in mins)<br>1 mm X 50 mm column | Flow rate<br>(ml/min) | % solvent A | % solvent B |
|----------------------------------------|---------------------------------------|-----------------------|-------------|-------------|
| Initial                                | Initial                               | 0.100                 | 55          | 45          |
| 5                                      | 0.50                                  | 0.100                 | 55          | 45          |
| 10                                     | 4.50                                  | 0.100                 | 0           | 100         |
| 15                                     | 7.20                                  | 0.100                 | 0           | 100         |
| 16                                     | 7.30                                  | 0.100                 | 55          | 45          |
| 20                                     | 10                                    | 0.100                 | 55          | 45          |

232

233 MRM and NL scans: Dwell time of 65 milliseconds were used for experiments with CAD value of -  
234 2, GS1 and GS2 at 20, CUR (Curtain gas) at 37, IS (ESI Voltage) as 5200 and TEM (Source  
235 Temperature) as 5200. The following table lists the distinct parameters used for all PIP species and  
236 PIP<sub>2</sub> species.

237

238

| Parameters                          | PIP species | PIP <sub>2</sub> species |
|-------------------------------------|-------------|--------------------------|
| DP (Declustering Potential)         | 140         | 60                       |
| EP (Entrance Potential)             | 12          | 11                       |
| CE (Collision Energy)               | 29          | 37                       |
| CXP (Collision cell Exit Potential) | 12          | 15                       |

239

240

241 *Thin layer Chromatography*

242 Extracted lipids were resuspended in chloroform and resolved by TLC (preactivated by heating at  
243 90°C for 1 hour) with a running solvent (45:35:8:2 chloroform: methanol: water:25% ammonia).  
244 Plates were air dried and imaged on a Typhoon Variable Mode Imager (Amersham Biosciences).

## 245 *Software and data analysis*

246 Image analysis was performed by Fiji software (Open source). Mass spec data was acquired on  
247 Analyst® 1.6.2 software followed by data processing and visualisation using MultiQuant™ 3.0.1  
248 software and PeakView® Version 2.0., respectively. Chemical structures were drawn with  
249 ChemDraw® Version 16.0.1.4. Illustrations were created with BioRender.com. All datasets were  
250 statistically analysed using MS-Excel (Office 2016).

251

## 252 **Results**

### 253 <sup>18</sup>O-ATP can be used in an *in vitro* PIP<sub>4</sub>K assay

254 Lipid extracts from biological samples are expected to contain a mixture of all the phosphoinositides  
255 including PI<sub>5</sub>P and PI(4,5)P<sub>2</sub>. As a result, any assay that measures PI<sub>5</sub>P in a mixture by converting  
256 it to PI(4,5)P<sub>2</sub> must be capable of producing unique PI(4,5)P<sub>2</sub> species distinguishable from the  
257 endogenous PI(4,5)P<sub>2</sub> already present. To this end, we established a simple but innovative  
258 modification to the existing radioactive PI<sub>5</sub>P mass assay where we substituted the use <sup>32</sup>P ATP to γ-  
259 PO<sub>4</sub><sup>3-</sup> <sup>18</sup>O labelled ATP [<sup>18</sup>O ATP]; a schematic of the reaction is shown in Figure 1A. This allowed  
260 us to detect and quantify the product generated in the reaction by liquid chromatography coupled  
261 to a tandem mass spectrometer (LC-MS/MS). We expressed and purified GST-PIP<sub>4</sub>Kα and tested  
262 its activity on 600 picomoles of synthetic deuterated PI<sub>5</sub>P (d<sub>5</sub>-diC<sub>16</sub>-PI<sub>5</sub>P) custom synthesized by  
263 Avanti Polar Lipids. Lipids were extracted at the end of the assay, and the contents derivatized using  
264 TMS-diazomethane and injected through an in-line C<sub>4</sub> UPLC column connected to a triple  
265 quadrupole mass spectrometer. Multiple reaction monitoring (MRM) method was used to selectively  
266 follow the elution of individual lipids. This method detects and allows quantification of a signature  
267 parent-daughter ion pair for a given molecule with high sensitivity [24]. Fragmentation of any PIP  
268 and PIP<sub>2</sub> parent ions results in a loss of a neutral head group of fixed masses of 382 and 490 Da  
269 respectively [25]. When <sup>18</sup>O-ATP is used in this kinase reaction, both the mass of the parent PIP<sub>2</sub>  
270 product and consequently, the neutral fragment generated due to fragmentation, increases by 6 Da  
271 to 496 Da (Figure 1B indicates the <sup>18</sup>O in red). The other major fragment generated is the charged  
272 diacylglycerol group whose mass depends on the length and saturation of the fatty acyl chain at *sn*-  
273 1 and *sn*-2 position and can be calculated theoretically (Figure 1B). Thus, the d<sub>5</sub>-PI<sub>5</sub>P molecule can  
274 be detected as the MRM parent/daughter ion transition of 938.5/556.5 (difference in mass: 382 Da),  
275 d<sub>5</sub>-PIP<sub>2</sub> as 1046.5/556.5 (difference in mass: 490 Da) and d<sub>5</sub>-<sup>18</sup>O-PIP<sub>2</sub> as 1052.5/556.5 (difference in  
276 mass: 496 Da). Using this rationale, we observed two major peaks from the reaction in which GST-  
277 PIP<sub>4</sub>Kα was incubated with d<sub>5</sub>-PI<sub>5</sub>P (Figure 1C). The first peak at R<sub>t</sub>=9.84 min corresponded to a

278 methylated d<sub>5</sub>-PI<sub>5</sub>P and the second peak at R<sub>t</sub>= 9.92 min corresponded to a methylated d<sub>5</sub>-<sup>18</sup>O PIP<sub>2</sub>  
279 (Figure 1C). The response ratio, expressed as area under the curve of product (d<sub>5</sub>-<sup>18</sup>O-PIP<sub>2</sub>) divided  
280 by the substrate (PI<sub>5</sub>P) was around 1.9 showing that there was significant production of d<sub>5</sub>-<sup>18</sup>O-PIP<sub>2</sub>  
281 in the reaction (Figure 1D). Interestingly, a very small amount of d<sub>5</sub>-PIP<sub>2</sub> was obtained (response  
282 ratio ~ 0.02) that could arise from the <sup>16</sup>O-ATP impurity in the commercial <sup>18</sup>O ATP (Figure 1C').

283

284 Usually, when working with biological samples, radioactive mass assays have reported a minimum  
285 detection limit of 1 picomole of converted PI<sub>5</sub>P [16]. We observe that in our LC-MS/MS method,  
286 we could linearly detect the conversion of PI<sub>5</sub>P to <sup>18</sup>O-PIP<sub>2</sub>, even at a sub-picomole range when these  
287 lipids were loaded on column (Figure 1E). The conversion of such low amounts of PI<sub>5</sub>P was possible  
288 only with 16 hours of incubation and not with a 1-hour incubation (data not shown). Based on this  
289 observation, we decided to conduct our assays with biological samples, where PI<sub>5</sub>P levels are low,  
290 for 16 hours.

291

#### 292 GST-PIP<sub>4</sub>K $\alpha$ is suitable for assaying PI<sub>5</sub>P by LC-MS/MS method

293 It is known from previous studies that in addition to PI<sub>5</sub>P, as a substrate, PIP<sub>4</sub>Ks have a lower but  
294 significant *in vitro* activity on PI<sub>3</sub>P [26]. The radioactivity based PI<sub>5</sub>P mass assay can distinguish  
295 between the products formed from these two substrates because of the difference in migration of  
296 labelled PI<sub>(4,5)</sub>P<sub>2</sub> and PI<sub>(3,4)</sub>P<sub>2</sub> on a one dimensional TLC (Figure 2A). However, since there is  
297 presently no robust method to distinguish intact PIP<sub>2</sub> isomers on LC-MS platforms, it was prudent  
298 to expect that the total PIP<sub>2</sub> formed in the PIP<sub>4</sub>K $\alpha$  kinase assay performed on lipids extracted from  
299 biological samples could have some contribution from PI<sub>(3,4)</sub>P<sub>2</sub> in addition to PI<sub>(4,5)</sub>P<sub>2</sub>. We  
300 performed control experiments to estimate the amount of PI<sub>(3,4)</sub>P<sub>2</sub> that might be formed in our <sup>18</sup>O-  
301 ATP based kinase assay. To estimate this, we calculated the slopes of product formation when using  
302 increasing concentrations of synthetic PI<sub>3</sub>P or PI<sub>5</sub>P. At first, using the radioactivity (<sup>32</sup>P ATP) based  
303 kinase assay, we observed that the intensities of PIP<sub>2</sub> spots produced from diC16-PI<sub>5</sub>P and diC16-  
304 PI<sub>3</sub>P substrate were very different over the same range of substrate concentrations (Figure 2A). The  
305 slope of PI<sub>(4,5)</sub>P<sub>2</sub> formation from PI<sub>5</sub>P was 22 times steeper than that of PI<sub>(3,4)</sub>P<sub>2</sub> formation from  
306 PI<sub>3</sub>P over a nanomole concentration range of each substrate (Figure 2B). Lipid samples prepared  
307 from cells for the kinase assay will have a mixture of PI<sub>5</sub>P and PI<sub>3</sub>P, wherein the levels of PI<sub>3</sub>P would  
308 be equal or higher than that of PI<sub>5</sub>P by about 2-3 times [13,27].

309 Next we tested the relative amounts of PI<sub>(3,4)</sub>P<sub>2</sub> vs. PI<sub>(4,5)</sub>P<sub>2</sub> formed by PIP<sub>4</sub>K $\alpha$  when presented as  
310 a mixture of PI<sub>3</sub>P and PI<sub>5</sub>P. We used synthetic 17:0/20:4 odd chain PI<sub>3</sub>P (MRM: 995.5/613.5) and  
311 diC16-d<sub>5</sub>-PI<sub>5</sub>P (MRM: 938.5/556.5) which have distinctive masses despite being PIP isomers, thus



312 allowing easy identification and quantification of the respective products formed from a mixture of  
313 PI<sub>3</sub>P and PI<sub>5</sub>P on a mass spectrometer. To test the extent of PI<sub>(3,4)</sub>P<sub>2</sub> and PI<sub>(4,5)</sub>P<sub>2</sub> formation from  
314 these two substrates, we mixed them at a molar ratio of 1:4, PI<sub>5</sub>P:PI<sub>3</sub>P, mimicking the relative  
315 abundances of these two lipids in cells. We observed that while there was detectable PI<sub>(3,4)</sub>P<sub>2</sub>  
316 formation (MRM: 1109.5/613.5; difference of 496 Da) from the PI<sub>3</sub>P substrate (albeit at higher  
317 amounts of starting substrate), the dependence of PI<sub>(3,4)</sub>P<sub>2</sub> formation on PI<sub>3</sub>P concentration had a  
318 lower slope compared to that for PI<sub>(4,5)</sub>P<sub>2</sub> formation from PI<sub>5</sub>P (Figure 2C) and was similar to that  
319 observed in the radioactivity based PIP<sub>4</sub>K $\alpha$  assays. Theoretically, in lipid extracts of genetic mutants  
320 of PI<sub>5</sub>P regulating enzymes, there will be a change in the molar ratios of PI<sub>5</sub>P to PI<sub>3</sub>P from the ratio  
321 in normal conditions. We observed that the response ratio of products formed from PI<sub>5</sub>P were  
322 always greater than compared to PI<sub>3</sub>P across a range of molar ratios of PI<sub>5</sub>P:PI<sub>3</sub>P, assayed under the  
323 given conditions, indicating that PIP<sub>4</sub>K $\alpha$  will estimate PI<sub>5</sub>P much better over a broad range (Figure  
324 2D). In summary, these data suggest that in our LC-MS/MS based assay (henceforth to be called the  
325 <sup>18</sup>O-ATP mass assay), recombinant PIP<sub>4</sub>K $\alpha$  can potentially be used to assay PI<sub>5</sub>P levels from a mixed  
326 phosphoinositide pool with limited contribution from PI<sub>3</sub>P.

327

328 A significant amount of PI<sub>(3,4)</sub>P<sub>2</sub> was observed mainly when micromole amount of PI<sub>3</sub>P was used  
329 as substrate (Figure 2B). However, such high amounts of PI<sub>3</sub>P is unlikely to occur in small biological  
330 samples. To test this, we extracted total lipids from wandering 3<sup>rd</sup> instar *Drosophila* larvae of wild  
331 type (WT) and compared it to *dPIP<sub>4</sub>K<sup>29</sup>* mutant, where PI<sub>5</sub>P levels are higher. We noted a single spot  
332 of PI<sub>(4,5)</sub>P<sub>2</sub> for both samples on the TLC as reported earlier [16] (Figure 2E). We did not observe a  
333 separate spot on the TLC, corresponding to PI<sub>(3,4)</sub>P<sub>2</sub> that migrated with a distinct mobility  
334 compared to PI<sub>(4,5)</sub>P<sub>2</sub>. This implied that the amount of PI<sub>3</sub>P used by GST-PIP<sub>4</sub>K $\alpha$ , to generate  
335 PI<sub>(3,4)</sub>P<sub>2</sub> under these assay conditions was negligible (Figure 2E).

336

### 337 <sup>18</sup>O-ATP based mass assay allows detection of multiple PI<sub>5</sub>P species in *Drosophila*

338 The strategy of methylating low abundance and poorly ionisable lipids such as PIP<sub>3</sub> was initially  
339 described by Clark et.al [22]. If this approach is applied to the biological lipids extracted at the end  
340 of our <sup>18</sup>O-ATP mass assay, one should be able to detect low abundant methylated <sup>18</sup>O-PIP<sub>2</sub> products  
341 (precursor ion in Figure 1B). As described earlier, fragmentation of these precursor ions should  
342 generate (i) a neutral head group of fixed mass 496 Da and (ii) a charged diacylglycerol fragments  
343 whose mass would depend on the length and saturation of the fatty acyl chain at *sn-1* and *sn-2*  
344 positions (R<sub>1</sub> and R<sub>2</sub> in Figure 1B). After performing the <sup>18</sup>O-ATP mass assay with lipid extracts from  
345 wild type larvae, we used neutral loss scanning (NLS) to identify all the precursor ions which generate

346 fragments after loss of neutral mass 496 Da; this approach allowed us to identify eight such parent  
347 masses (Figure 3Ai) that produced a neutral loss fragment of 496 Da. This result implies the existence  
348 of eight molecular species of PI<sub>5</sub>P that were captured during the <sup>18</sup>O-PIP<sub>2</sub> assay. The acyl chain  
349 lengths of these <sup>18</sup>O-PIP<sub>2</sub> were calculated by subtracting 496 Da from the observed parent masses  
350 (Table1). Next, we performed a neutral loss scan for 382 Da corresponding to the neutral head group  
351 that could be generated from PIP species using the same lipid extract as above. The masses of <sup>18</sup>O-  
352 PIP<sub>2</sub> species detected correlated well with the masses of the corresponding PIP molecules (Figure 3  
353 Aii). Using this information and theoretical calculation, we set up multiple reaction monitoring  
354 (MRM) methods with the Q<sub>1</sub>/Q<sub>3</sub> masses mentioned in Table1 and detected the intensities of the  
355 various <sup>18</sup>O-PIP<sub>2</sub> species from wild type *Drosophila* larval samples (Figure 3B). Using this MRM  
356 method, we detected all eight individual species described above, thus confirming our results from  
357 the Neutral loss scans. We observed that the 34:2 species was the most abundant followed by 36:3,  
358 36:2, 34:3 and 32:1. These data correlate well with the molecular species of PIP<sub>3</sub> recently reported  
359 from *Drosophila* larval tissues [23]

360

#### 361 **Loss of *Drosophila* dPIP<sub>4</sub>K results in elevated PI<sub>5</sub>P, measured as <sup>18</sup>O-PIP<sub>2</sub> signal**

362 We tested the ability of our method to detect and quantify the increase in PI<sub>5</sub>P levels earlier reported  
363 from adult flies of *dPIP<sub>4</sub>K<sup>29</sup>*, a protein null allele of *Drosophila* PIP<sub>4</sub>K [19]. An immunoblot was  
364 performed to confirm that the mutant larvae did not have any dPIP<sub>4</sub>K protein (Figure 4A). Figure  
365 4B describes the workflow used to estimate PI<sub>5</sub>P levels from biological sample. The 3<sup>rd</sup> instar  
366 wandering larval stage of *Drosophila* is a good model to study changes in growth and development  
367 in the organism. Since *dPIP<sub>4</sub>K<sup>29</sup>* larvae show defects in growth and cell size, studying the regulation  
368 of PI<sub>5</sub>P in such a system will allow us to understand the relevance of this lipid to cellular growth and  
369 metabolism. To this end, we compared PI<sub>5</sub>P levels between wild type and *dPIP<sub>4</sub>K<sup>29</sup>* larvae. PI<sub>5</sub>P was  
370 measured using <sup>18</sup>O-PIP<sub>2</sub> levels relative to an internal standard, and normalised for tissue size by a  
371 total organic phosphate measurement obtained from the third step of the sample preparation (Figure  
372 4B and methods). We found increased PI<sub>5</sub>P in *dPIP<sub>4</sub>K<sup>29</sup>* consistent with previous observations using  
373 radioactive mass assay that reported that PI<sub>5</sub>P levels are elevated in *dPIP<sub>4</sub>K<sup>29</sup>* [19]. Figure 4C  
374 captures the acyl chain length diversity of larval PI<sub>5</sub>P; all of the eight detected species of <sup>18</sup>O-PIP<sub>2</sub>  
375 were elevated in *dPIP<sub>4</sub>K<sup>29</sup>* implying that the corresponding species of PI<sub>5</sub>P were elevated in *dPIP<sub>4</sub>K<sup>29</sup>*.  
376 In *Drosophila* larval extracts, the major species of PI<sub>5</sub>P are those with acyl chain 34:2 and 36:3; both  
377 of these were elevated. In addition, six other species of unique acyl chain length that we could detect  
378 were also elevated.

379



380 We also assayed PI<sub>5</sub>P levels from *Drosophila* S2R+ cells that had been depleted of dPIP<sub>4</sub>K using with  
381 two different dsRNAs [recently reported in [23]]. Under our experimental conditions, treatment  
382 with either dsRNA resulted in complete depletion and dPIP<sub>4</sub>K protein could not be detected by  
383 western blot analysis (Figure 4E). The <sup>18</sup>O-PIP<sub>2</sub> mass assay using lipid extracts from these cells  
384 showed elevated levels of PI<sub>5</sub>P with a slight difference in the extent of PI<sub>5</sub>P elevation induced by  
385 each dsRNA (Figure 4F). We also estimated the level of each of the eight molecular species of PI<sub>5</sub>P  
386 and found that all of them were elevated on depletion of dPIP<sub>4</sub>K (Figure 4G). Thus, both in  
387 *Drosophila* larvae and S2R+ cells, using our <sup>18</sup>O-ATP mass assay, we found that the major species of  
388 PI<sub>5</sub>P were elevated upon depletion of dPIP<sub>4</sub>K demonstrating that measurements done with our new  
389 method compare well with those previously reported using the radioactive mass assay.

390

## 391 Discussion

392 20 years since the discovery of PI<sub>5</sub>P, the mechanisms by which its levels are regulated *in vivo* still  
393 remain unclear and is a matter of great interest owing to its proposed roles in various cell biological  
394 processes like cell growth, cell migration, autophagic and stress responses and apoptosis [28]. A key  
395 challenge in addressing this question has been the lack of a robust method to quantify PI<sub>5</sub>P. Till date,  
396 PI<sub>5</sub>P detection has relied principally on the use of analytical techniques that use radioactive labels  
397 [17] that are challenging to use on *in vivo* models. Here we describe a robust method to measure  
398 PI<sub>5</sub>P levels that does not require the use of radiolabelling and hence avoids associated hazards. The  
399 availability of our method offers additional advantages over the use of radiolabelling approaches.  
400 These include better control over the data variation due to the use of an internal standard for  
401 quantification in LC-MS/MS experiments and the ability to separately quantify each species of PIP  
402 and PIP<sub>2</sub> separately. The use of this method in conjunction with genetically tractable metazoan  
403 models for *in vivo* analysis should facilitate the analysis of PI<sub>5</sub>P turnover *in vivo*. Our method, an  
404 adaptation of the conventional radiolabel based conversion of PI<sub>5</sub>P to PI(4,5)P<sub>2</sub> shows superior  
405 sensitivity to the conventional method and is able to detect lipid in the sub-picomolar range; this will  
406 facilitate analysis even from small sized samples derived from *in vivo* settings such as animal models,  
407 biopsies, micro-dissected specimens and other high value samples whose analysis might inform on  
408 PI<sub>5</sub>P metabolism or signalling. For example, over the years, it has been clear from analysis of the  
409 gene PIKFYVE in mammals, that this enzyme can synthesize PI<sub>5</sub>P [6,8,29]. However, due to its  
410 activity *in vitro* on both PI and PI<sub>3</sub>P, the route by which it synthesises PI<sub>5</sub>P *in vivo* is still debatable.  
411 The later route requires a 3-phosphatase, members of the myotubularin in mammals, to convert the  
412 PI(3,5)P<sub>2</sub> to PI<sub>5</sub>P. An analysis of this specific route in mammals has been limited since mammals

413 have around 14 homologs that can potentially encode myotubularin activity [30]. *Drosophila* has  
414 only 4 predicted orthologs of myotubularin and thus offers a better metazoan model to study the  
415 existence of phosphatases that can regulate PI<sub>5</sub>P. PI<sub>5</sub>P elevations in the nucleus have been reported  
416 in the context of stress signals and DNA damaging agents such as radiation implicating this lipid in  
417 cell signalling in the setting of cancer biology [[3,31,32] and reviewed in [33]]. The availability of our  
418 highly sensitive, non-radioactive mass assay will allow the measurement of PI<sub>5</sub>P levels in micro-  
419 dissected biopsy samples from human tumours where the application of radioactive mass assays will  
420 be challenging. Results from such samples using our assay could help decipher signalling  
421 mechanisms in human tumours and help inform decision making in clinical oncology. Finally,  
422 PIP<sub>4</sub>K a key enzyme in the regulation of PI<sub>5</sub>P levels has been recently implicated in the control of  
423 insulin receptor signalling and Type II diabetes [23,34,35]. The mechanisms by which PIP<sub>4</sub>K  
424 regulates insulin signalling remain unclear but the use of our assay on human samples of small size  
425 and high value could help in the study of the role of this enzyme and its control of PI<sub>5</sub>P levels in  
426 human type II diabetes settings.

427

428 Although our mass assay has been developed for PI<sub>5</sub>P measurement, its use is not limited to the  
429 assay of just this lipid. In principle, it could also be used to measure the levels of other  
430 phosphoinositides that can also be assayed using an *in vitro*, enzyme based conversion mass assay  
431 [17]. Thus, the method we have described to measure PI<sub>5</sub>P is a safe and scalable technique that will  
432 be of great interest to both researchers specifically exploring PI<sub>5</sub>P metabolism and phosphoinositide  
433 signalling in general.

434

435 **Acknowledgements:** We thank the NCBS Mass spectrometry facility for support.

436 **Funding Information:** This work was funded by the National Centre for Biological Sciences-  
437 TIFR and a Wellcome-DBT India Alliance Senior Fellowship to PR (IA/S/14/2/501540). VR was  
438 supported by a Research Associateship from the Department of Biotechnology, Government of  
439 India.

440 **Author contributions:** AG, SS and DS conceptualized the project. AG, SS, VR and DS  
441 performed experiments. AG and SS analysed data. Writing: AG, SS and PR. Supervision of project:  
442 PR. Funding acquisition: PR.

443

444 **Competing interests:** The authors declare that there are no competing interests associated with  
445 the manuscript.

446

447

## 448 **References**

449 1 Balla, T. (2013) Phosphoinositides: Tiny Lipids With Giant Impact on Cell Regulation.  
450 *Physiol. Rev.* **93**, 1019–1137.

451 2 Lucia E. Rameh\*, Kimberley F. Tolia, B. C. D. & L. C. C. (1997) A new pathway for synthesis  
452 of phosphatidylinositol- 4,5-bisphosphate. *Nature* **390**, 192–196.

453 3 Jones, D. R., Bultsma, Y., Keune, W. J., Halstead, J. R., Elouarrat, D., Mohammed, S., Heck,  
454 A. J., D'Santos, C. S. and Divecha, N. (2006) Nuclear PtdIns5P as a transducer of stress  
455 signaling: an in vivo role for PIP4Kbeta. *Mol. Cell* **23**, 685–695.

456 4 Jones, D. R., Foulger, R., Keune, W.-J., Bultsma, Y. and Divecha, N. (2013) PtdIns5P is an  
457 oxidative stress-induced second messenger that regulates PKB activation. *FASEB J.* **27**, 1644–  
458 56.

459 5 Keune, W.-J., Jones, D. R. and Divecha, N. (2013) PtdIns5P and Pin1 in oxidative stress  
460 signaling. *Adv. Biol. Regul.* **53**, 179–89.

461 6 Sbrissa, D., Ikononov, O. C., Deeb, R. and Shisheva, A. (2002) Phosphatidylinositol 5-  
462 phosphate biosynthesis is linked to PIKfyve and is involved in osmotic response pathway in  
463 mammalian cells. *J. Biol. Chem.* **277**, 47276–84.

464 7 Sbrissa, D., Ikononov, O. C. and Shisheva, A. (1999) PIKfyve, a mammalian ortholog of yeast  
465 Fab1p lipid kinase, synthesizes 5-phosphoinositides. *Effect of insulin* **274**, 21589–21597.

466 8 Zolov, S. N., Bridges, D., Zhang, Y., Lee, W.-W., Riehle, E., Verma, R., Lenk, G. M., Converso-  
467 Baran, K., Weide, T., Albin, R. L., et al. (2012) In vivo, Pikfyve generates PI(3,5)P<sub>2</sub>, which  
468 serves as both a signaling lipid and the major precursor for PI5P. *Proc. Natl. Acad. Sci. U. S.*  
469 *A., National Academy of Sciences* **109**, 17472–7.

470 9 Várnai, P., Gulyás, G., Tóth, D. J., Sohn, M., Sengupta, N. and Balla, T. (2017) Quantifying  
471 lipid changes in various membrane compartments using lipid binding protein domains. *Cell*  
472 *Calcium* **64**, 72–82.

473 10 Gozani, O., Karuman, P., Jones, D. R., Ivanov, D., Cha, J., Lugovskoy, A. A., Baird, C. L., Zhu,

- 474 H., Field, S. J., Lessnick, S. L., et al. (2003) The PHD finger of the chromatin-associated  
475 protein ING2 functions as a nuclear phosphoinositide receptor 114, 99–111.
- 476 11 Vicinanza, M., Korolchuk, V. I., Ashkenazi, A., Puri, C., Menzies, F. M., Clarke, J. H. and  
477 Rubinsztein, D. C. (2015) PI(5)P regulates autophagosome biogenesis. *Mol. Cell* 57, 219–34.
- 478 12 Wills, R. C., Goulden, B. D. and Hammond, G. R. V. (2018) Genetically encoded lipid  
479 biosensors. *Mol. Biol. Cell* (Kozminski, K. G., ed.) 29, 1526–1532.
- 480 13 Sarkes, D. and Rameh, L. E. (2010) A novel HPLC-based approach makes possible the spatial  
481 characterization of cellular PtdIns5P and other phosphoinositides. *Biochem. J.* 428, 375–84.
- 482 14 Kiefer, S., Rogger, J., Melone, A., Mertz, A. C., Koryakina, A., Hamburger, M. and Koenzi, P.  
483 (2010) Separation and detection of all phosphoinositide isomers by ESI-MS. *J. Pharm.*  
484 *Biomed. Anal., Elsevier B.V.* 53, 552–558.
- 485 15 Jeschke, A., Zehethofer, N., Lindner, B., Krupp, J., Schwudke, D., Haneburger, I., Jovic, M.,  
486 Backer, J. M., Balla, T., Hilbi, H., et al. (2015) Phosphatidylinositol 4-phosphate and  
487 phosphatidylinositol 3-phosphate regulate phagolysosome biogenesis. *Proc. Natl. Acad. Sci.*  
488 112, 201423456.
- 489 16 Jones, D. R., Ramirez, I. B.-R., Lowe, M. and Divecha, N. (2013) Measurement of  
490 phosphoinositides in the zebrafish *Danio rerio*. *Nat. Protoc., Nature Publishing Group* 8,  
491 1058–72.
- 492 17 Viaud, J., Chicanne, G., Solinhac, R. and Hnia, K. (2017) Mass Assays to Quantify Bioactive  
493 PtdIns3P and PtdIns5P During Autophagic Responses. *Mol. Charact. Autophagic Responses*  
494 Part A 1st ed., Elsevier Inc.
- 495 18 Brand, A. H. and Perrimon, N. (1993) Targeted gene expression as a means of altering cell  
496 fates and generating dominant phenotypes 415, 401–415.
- 497 19 Gupta, A., Toscano, S., Trivedi, D., Jones, D. R., Mathre, S., Clarke, J. H., Divecha, N. and  
498 Raghu, P. (2013) Phosphatidylinositol 5-phosphate 4-kinase (PIP4K) regulates TOR  
499 signaling and cell growth during *Drosophila* development. *Proc Natl Acad Sci U S A* 110,  
500 5963–5968.
- 501 20 Kamalesh, K., Trivedi, D., Toscano, S., Sharma, S., Kolay, S. and Raghu, P. (2017)  
502 Phosphatidylinositol 5-phosphate 4-kinase regulates early endosomal dynamics during  
503 clathrin-mediated endocytosis. *J. Cell Sci.*

- 504 21 Worby, C. A., Simonson-leff, N. and Dixon, J. E. (2001) P ROTOCOL RNA Interference of  
505 Gene Expression ( RNAi ) in Cultured Drosophila Cells MATERIALS EQUIPMENT  
506 RECIPES ABSTRACT 1–9.
- 507 22 Clark, J., Anderson, K. E., Juvin, V., Smith, T. S., Karpe, F., Wakelam, M. J. O., Stephens, L.  
508 R. and Hawkins, P. T. (2011) Quantification of PtdInsP<sub>3</sub> molecular species in cells and tissues  
509 by mass spectrometry. *Nat. Methods*, Nature Publishing Group 8, 267–272.
- 510 23 Sharma, S., Mathre, S., Ramya, V., Shinde, D. and Raghu, P. (2019) Phosphatidylinositol 5  
511 Phosphate 4-Kinase Regulates Plasma-Membrane PIP<sub>3</sub> Turnover and Regulates Plasma-  
512 Membrane PIP<sub>3</sub> Turnover and Insulin Signaling. *CellReports*, ElsevierCompany. 27, 1979-  
513 1990.e7.
- 514 24 Kielkowska, A., Niewczas, I., Anderson, K. E., Durrant, T. N., Clark, J., Stephens, L. R. and  
515 Hawkins, P. T. (2014) A new approach to measuring phosphoinositides in cells by mass  
516 spectrometry. *Adv. Biol. Regul.*, The Authors 54, 131–141.
- 517 25 Balakrishnan, S. S., Basu, U., Shinde, D., Thakur, R. and Jaiswal, M. (2018) Regulation of PI4P  
518 levels by PI4KIII  $\alpha$  during G-protein coupled PLC signaling in Drosophila photoreceptors.
- 519 26 Zhang, X., Loijens, J. C., Boronenkov, I. V, Parker, G. J., Norris, F. A., Chen, J., Thum, O.,  
520 Prestwich, G. D., Majerus, P. W. and Anderson, R. A. (1997) Phosphatidylinositol-4-  
521 phosphate 5-kinase isozymes catalyze the synthesis of 3-phosphate-containing  
522 phosphatidylinositol signaling molecules. *J. Biol. Chem.* 272, 17756–61.
- 523 27 Shisheva, A., Sbrissa, D. and Ikononov, O. (2015) Plentiful PtdIns5P from scanty  
524 PtdIns(3,5)P<sub>2</sub> or from ample PtdIns? PIKfyve-dependent models: Evidence and speculation  
525 (response to: DOI 10.1002/bies.201300012). *BioEssays* 37, 267–277.
- 526 28 McCartney, A. J., Zhang, Y. and Weisman, L. S. (2014) Phosphatidylinositol 3,5-  
527 bisphosphate: low abundance, high significance. *Bioessays* 36, 52–64.
- 528 29 Ikononov, O. C., Sbrissa, D., Delvecchio, K., Xie, Y., Jin, J.-P., Rappolee, D. and Shisheva, A.  
529 (2011) The phosphoinositide kinase PIKfyve is vital in early embryonic development:  
530 preimplantation lethality of PIKfyve<sup>-/-</sup> embryos but normality of PIKfyve<sup>+/-</sup> mice. *J. Biol.*  
531 *Chem.* 286, 13404–13.
- 532 30 Raess, M. A., Friant, S., Cowling, B. S. and Laporte, J. (2017) Advances in Biological  
533 Regulation WANTED e Dead or alive: Myotubularins , a large disease- associated protein

- 534 family. Adv. Biol. Regul., Elsevier Ltd 63, 49–58.
- 535 31 Keune, W.-J., Sims, A. H., Jones, D. R., Bultsma, Y., Lynch, J. T., Jirström, K., Landberg, G.  
536 and Divecha, N. (2013) Low PIP<sub>4</sub>K<sub>2</sub>B expression in human breast tumors correlates with  
537 reduced patient survival: A role for PIP<sub>4</sub>K<sub>2</sub>B in the regulation of E-cadherin expression.  
538 Cancer Res. 73, 6913–25.
- 539 32 Jude, J. G., Spencer, G. J., Huang, X., Somerville, T. D. D., Jones, D. R., Divecha, N. and  
540 Somervaille, T. C. P. (2015) A targeted knockdown screen of genes coding for  
541 phosphoinositide modulators identifies PIP<sub>4</sub>K<sub>2</sub>A as required for acute myeloid leukemia cell  
542 proliferation and survival. Oncogene 34, 1253–62.
- 543 33 Fiume, R., Stijf-Bultsma, Y., Shah, Z. H., Keune, W. J., Jones, D. R., Jude, J. G. and Divecha,  
544 N. (2015) PIP<sub>4</sub>K and the role of nuclear phosphoinositides in tumour suppression. Biochim.  
545 Biophys. Acta - Mol. Cell Biol. Lipids, Elsevier B.V. 1851, 898–910.
- 546 34 Carricaburu, V., Lamia, K. A., Lo, E., Favereaux, L., Payrastra, B., Cantley, L. C. and Rameh,  
547 L. E. (2003) The phosphatidylinositol (PI)-5-phosphate 4-kinase type II enzyme controls  
548 insulin signaling by regulating PI-3,4,5-trisphosphate degradation. Proc. Natl. Acad. Sci. 100,  
549 9867–9872.
- 550 35 Wang, D. G., Paddock, M. N., Lundquist, M. R., Sun, J. Y., Mashadova, O., Amadiume, S.,  
551 Bumpus, T. W., Hodakoski, C., Hopkins, B. D., Fine, M., et al. (2019) PIP<sub>4</sub>Ks Suppress  
552 Insulin Signaling through a Catalytic-Independent Mechanism. Cell Rep. 27, 1991-2001.e5.

553

554

555

## 556 Figure Legends

557 Figure 1: <sup>18</sup>O-ATP used as a substrate in an *in vitro* PIP<sub>4</sub>K assay

558 (A) A schematic to show the reaction catalysed by GST-PIP<sub>4</sub>K $\alpha$  for a kinase reaction on PI<sub>5</sub>P (see  
559 methods for details) (B) Diagram representing methylated <sup>18</sup>O-PI(4,5)P<sub>2</sub> with +1 charge and the  
560 resultant products after fragmentation yielding a neutral head group of mass 496 Da and a charged  
561 diacylglycerol (DAG) fragment of mass = Parent mass (PM) – neutral loss (NL) mass. (C)  
562 Chromatogram representing the extracted ion chromatogram (XIC) of MRM transitions of substrate  
563 (d<sub>5</sub>-PI<sub>5</sub>P) in blue (938.5/556.5), the <sup>18</sup>O-d<sub>5</sub>-PIP<sub>2</sub> product in red (1052.5/556.5) and d<sub>5</sub>-PIP<sub>2</sub> product

564 in green (1046.5/556.5). C' shows that the d<sub>5</sub>-PIP<sub>2</sub> product formed in the reaction is negligible (~  
565 1%). (D) Quantification of response ratio of d<sub>5</sub>-<sup>18</sup>O-PI(4,5)P<sub>2</sub> formed from the earlier  
566 chromatogram. Number of individual reactions performed (n) = 3. Student's unpaired t-test with  
567 95% confidence interval shows significance between the no enzyme (bar 1) and with enzyme (bar 2).  
568 (D) A dose response curve of d<sub>5</sub>-PI<sub>5</sub>P ranging from 0.01 picomoles to 0.3 picomoles on column. Y-  
569 axis depicts intensity of d<sub>5</sub>-<sup>18</sup>O-PI(4,5)P<sub>2</sub> (in cps) and X-axis represents the amount of d<sub>5</sub>-PI<sub>5</sub>P  
570 loaded on column.

571

572 **Figure 2: LC-MS/MS based assay reveals that GST-PIP<sub>4</sub>K $\alpha$  is highly specific for PI<sub>5</sub>P and has**  
573 **lower affinity for PI<sub>3</sub>P**

574 (A) TLC shows radioactive products formed from increasing concentrations of diC<sub>16</sub>-PI<sub>5</sub>P or  
575 diC<sub>16</sub>-PI<sub>3</sub>P (Echelon) upon kinase reaction with GST-PIP<sub>4</sub>K $\alpha$  (see methods for details). Both assays  
576 have a 'no enzyme control' for 12 picomoles of lipid. PI(4,5)P<sub>2</sub> or PI(3,4)P<sub>2</sub> spots migrate with  
577 different R<sub>f</sub> and are labelled on the TLC along with the origin (B) Pixel intensity of the TLC image  
578 from (A) has been quantified and plotted for both PI<sub>5</sub>P and PI<sub>3</sub>P. Equations for PI<sub>5</sub>P:  $y = 250.32x$   
579  $+ 53.897$ ; PI<sub>3</sub>P:  $y = 12.771x + 9.5691$  (C) Intensity response (cps) of respective products of PI<sub>3</sub>P and  
580 PI<sub>5</sub>P, using different substrate amounts from a <sup>18</sup>O ATP based kinase assay experiment analysed by  
581 LC-MS/MS using d<sub>5</sub>-diC<sub>16</sub>-PI<sub>5</sub>P or 17:0 20:4 PI<sub>3</sub>P as indicated in the X-axis. Equations for PI<sub>5</sub>P:  $y$   
582  $= 575245x - 841692$ ; PI<sub>3</sub>P:  $y = 25265x - 39253$  (D) Response ratio of PI<sub>5</sub>P vs PI<sub>3</sub>P at different molar  
583 ratios of PI<sub>5</sub>P to PI<sub>3</sub>P. Y-axis represents response ratio of either d<sub>5</sub>-<sup>18</sup>O-PIP<sub>2</sub> to d<sub>5</sub>-PI<sub>5</sub>P (PI<sub>5</sub>P) or  
584 17:0 20:4 <sup>18</sup>O-PIP<sub>2</sub> to 17:0 20:4 PI<sub>3</sub>P and X-axis represents molar ratio of PI<sub>5</sub>P:PI<sub>3</sub>P (E) TLC shows  
585 single radioactive spot corresponding to PI(4,5)P<sub>2</sub> from larvae of Wild type (WT) or *dPIP4K<sup>29</sup>*  
586 (mutant of dPIP<sub>4</sub>K) .

587

588 **Figures 3: Mass spectrometry setup for <sup>18</sup>O-ATP based mass assay of biological PI<sub>5</sub>P from**  
589 ***Drosophila***

590 (A) (i) Spectrum from + Neutral Loss of 496.0 Da (scanned for 1000 – 1245 Da) in a 20 min run. (ii)  
591 Spectrum from + Neutral Loss of 382.0 Da (scanned for 750 – 1245 Da) in a 20 min run. The Y-axis  
592 indicates intensity of ions and the X-axis represents Mass/Charge (in Da). The peaks are marked by  
593 masses which feature as parent masses of the respective neutral loss mass. Both scans were performed  
594 from WT assayed larval samples. The highlighted regions depict parent lipid species with a total of  
595 32 carbon (32 'C'), 34 carbon (34 'C')\_and 36 carbon (36 'C') atoms in the acyl chains; <sup>18</sup>O-PIP<sub>2</sub>  
596 species are also tabulated in Table 1 (B) Extracted ion Chromatogram (XIC) of WT larval assayed



597 samples for the species that were picked up in NL scans. For each of the chromatograms, the Y-axis  
598 represents intensity of the MRM corresponding to the species, and the X-axis represents time on the  
599 LC. The chromatograms are arranged in decreasing order of ion abundance.

600

601 **Figure 4: Loss of dPIP<sub>4</sub>K results in elevated PI<sub>5</sub>P, measured as <sup>18</sup>O-PIP<sub>2</sub> levels in *Drosophila***

602 (A) Western blot showing dPIP<sub>4</sub>K protein expression in da/+ and da/+; *dPIP<sub>4</sub>K<sup>29</sup>* samples prepared  
603 from 5 larvae. Tubulin is used as loading control. (B) Schematic summarising the methodology  
604 followed to perform the assay from *Drosophila* larval or S2R+ cells (C) Total <sup>18</sup>O-PIP<sub>2</sub> normalised  
605 to internal standard (17:0 20:4 PI(4,5)P<sub>2</sub>) divided by organic phosphate value from processed  
606 *Drosophila* larval samples of da/+ (pan larval Gal4 control) and da/+; *dPIP<sub>4</sub>K<sup>29</sup>* (dPIP<sub>4</sub>K mutant).  
607 n=3 where each sample has been prepared from five 3<sup>rd</sup> instar wandering larvae (see methods for  
608 details). Error bars represent S.E.M. p value by student's two tailed unpaired t-test is provided on the  
609 graph. (D) Different acyl chain length species of <sup>18</sup>O-PIP<sub>2</sub> of the data plotted in (B). Error bars  
610 represent S.E.M. Individual p value by student's two tailed unpaired t-test is provided above each bar  
611 on the graph. (E) Western blot showing dPIP<sub>4</sub>K protein expression in S2R+ cells treated with  
612 dsRNAs against GFP (Control) or dPIP<sub>4</sub>K dsRNA I or dsRNA II. Actin is used as loading control.  
613 (F) Total <sup>18</sup>O-PIP<sub>2</sub> normalised to internal standard (17:0 20:4 PI(4,5)P<sub>2</sub>) divided by organic  
614 phosphate value from processed *Drosophila* samples of GFP, dPIP<sub>4</sub>K I or dPIP<sub>4</sub>K II dsRNA treated  
615 S2R+ cells. n=3 where each sample has been prepared from starting cell density of 0.5 million cells.  
616 The samples have been pooled across two days and have been normalised to the GFP dsRNA values  
617 (see methods for details). The graph has been normalised taking the GFP dsRNA value as 1. Error  
618 bars represent S.E.M. (G) Representative graph showing different acyl chain length species of <sup>18</sup>O-  
619 PIP<sub>2</sub> normalised to internal standard (17:0 20:4 PI(4,5)P<sub>2</sub>) divided by organic phosphate value from  
620 2 samples of (F).

621

622 **Table 1: List of MRMs**

623

624 The mass of each parent ion detected in Q1 representing <sup>18</sup>O-PIP<sub>2</sub> is shown in column- Parent ion  
625 mass (Q1). The singly protonated fragment corresponding to a diacylglycerol fragment derived from  
626 each such parent ion is shown in column-Daughter ion mass (Q3). The acyl chain composition of  
627 this diacylglycerol fragment is shown in column-Computed Acyl chain length.

628



A

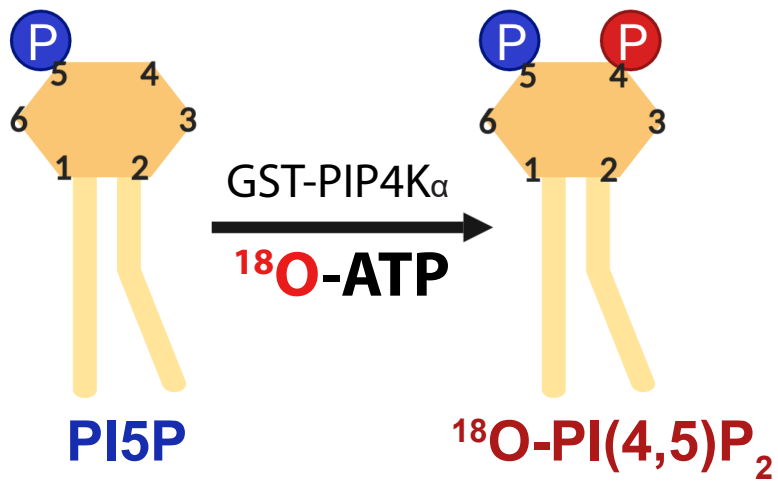

B

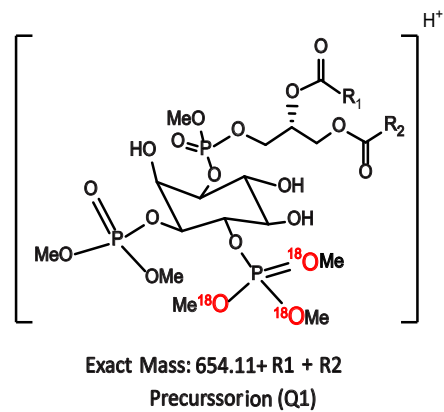

C

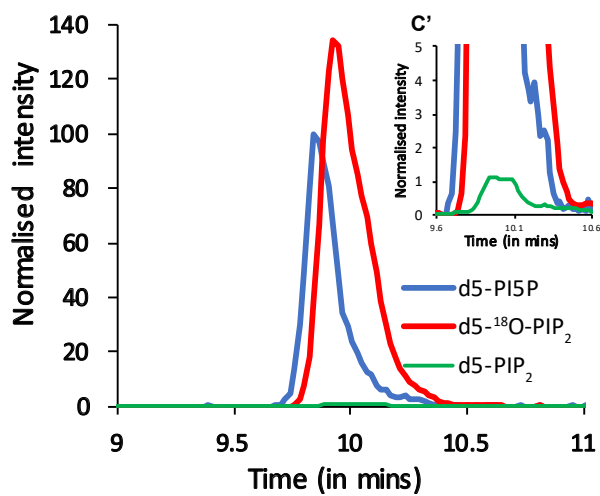

D

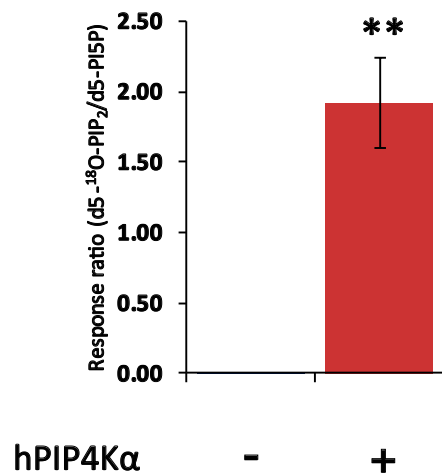

E

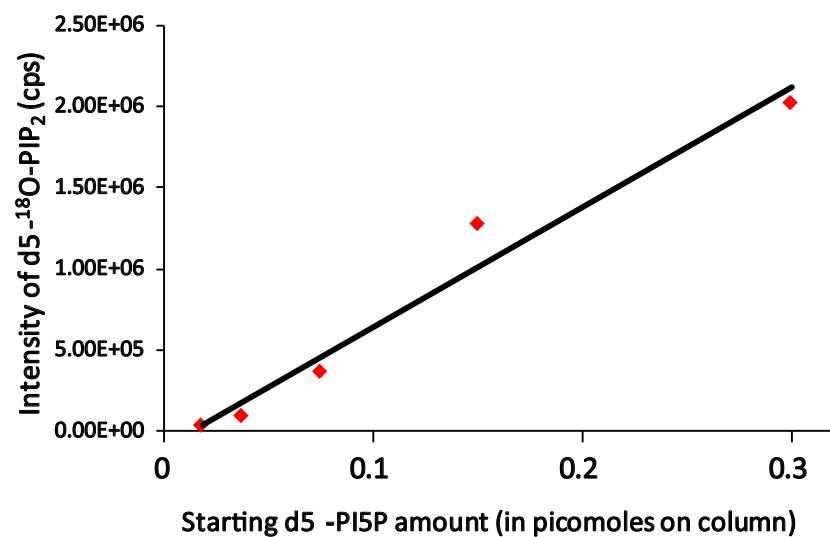

Figure 1

**A**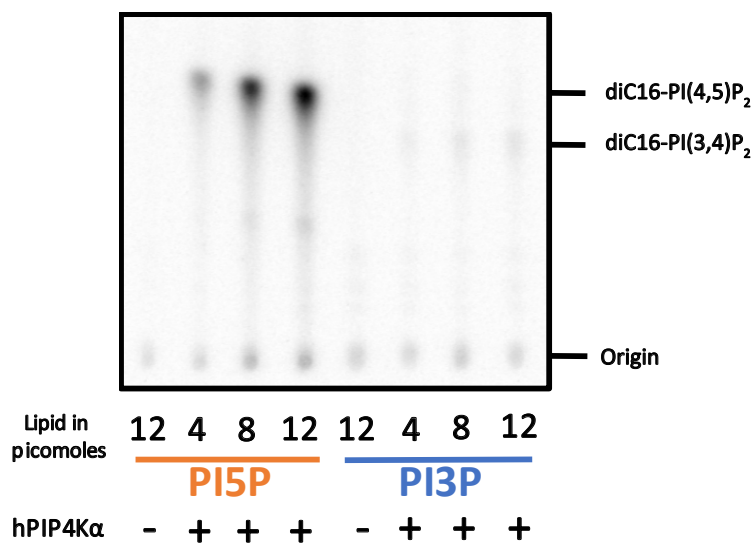**B**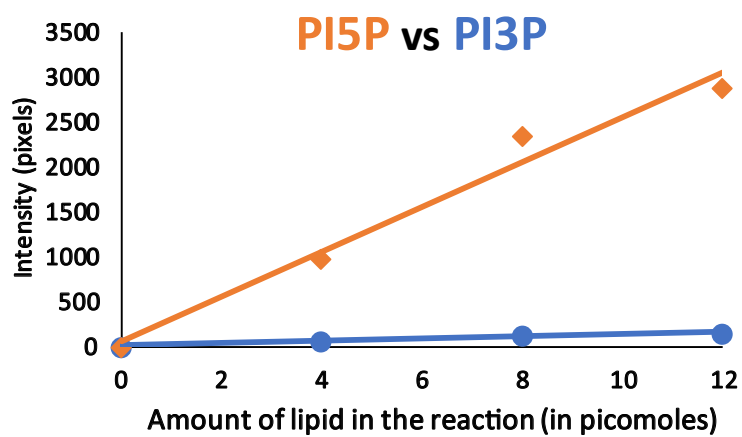**C**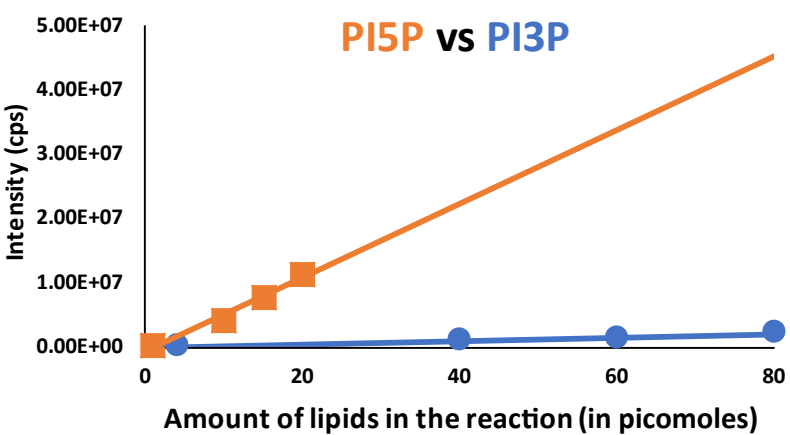**D**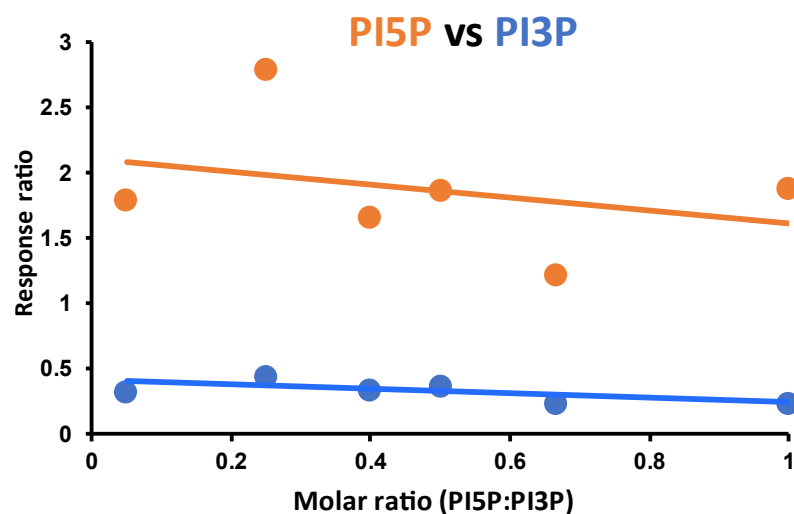**E**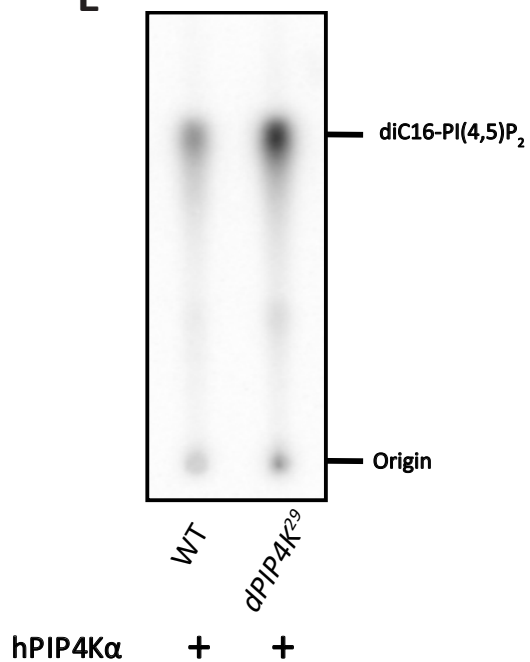

Figure 2

**A**

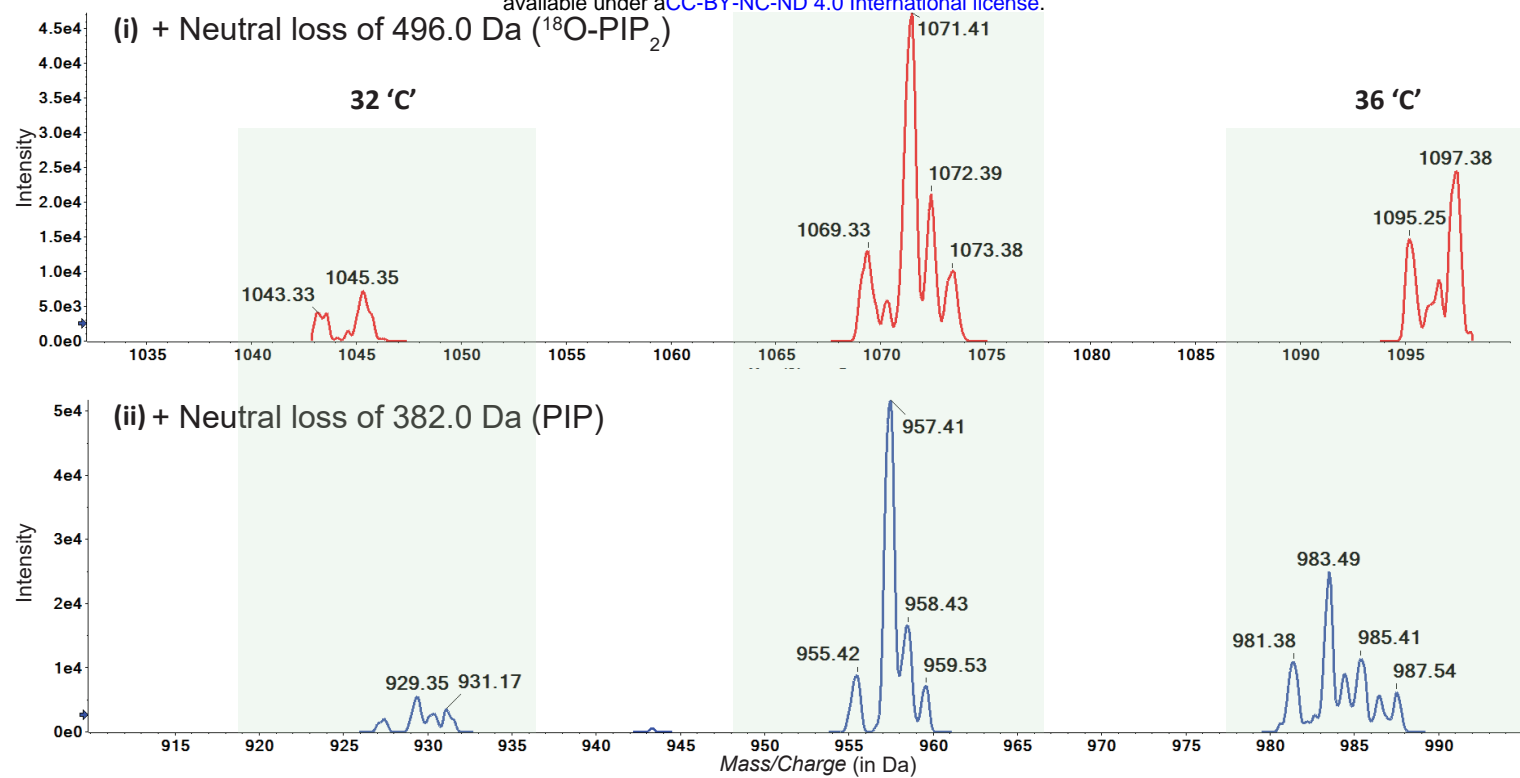

**B**

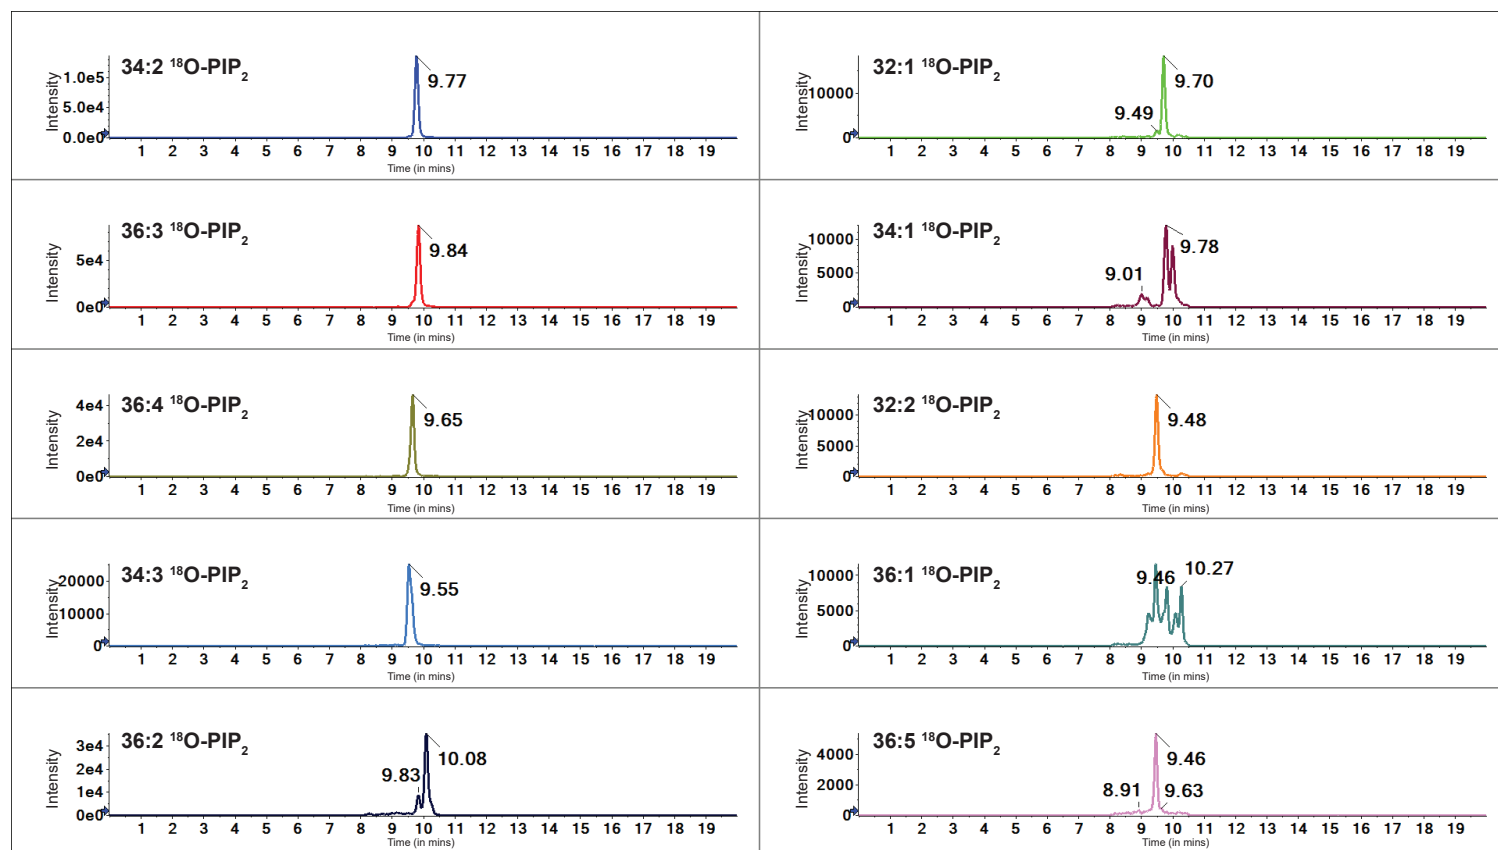

Figure 3

A

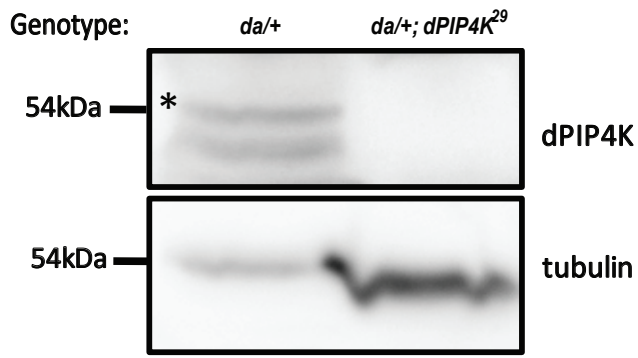

B

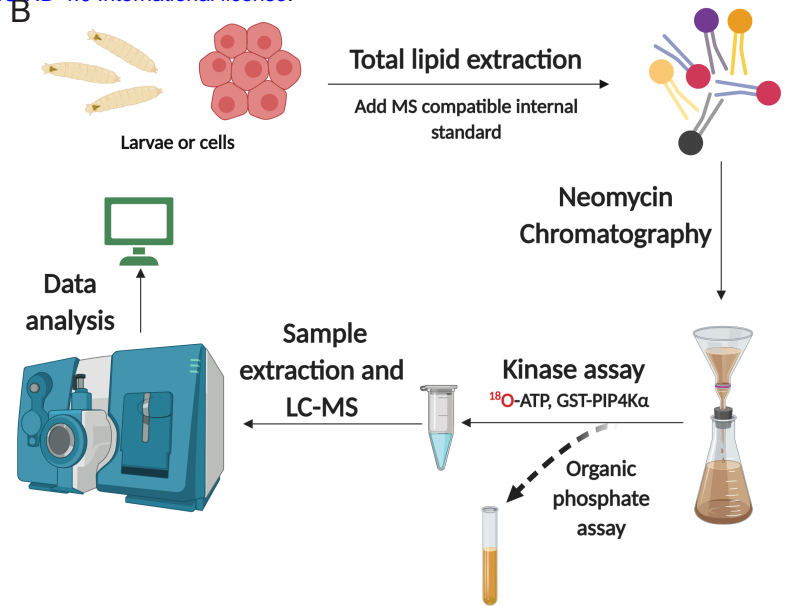

C

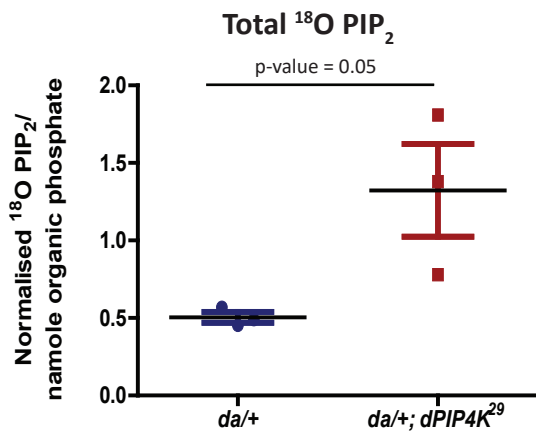

D

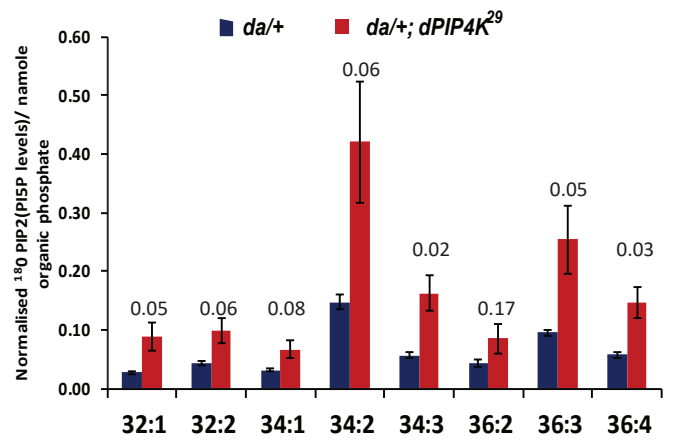

E

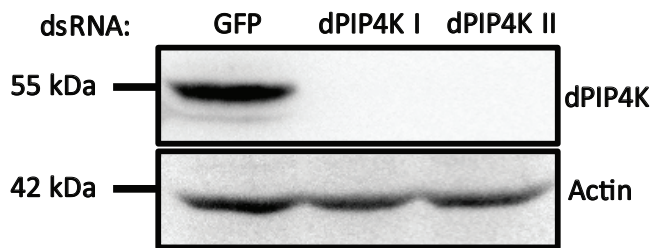

F

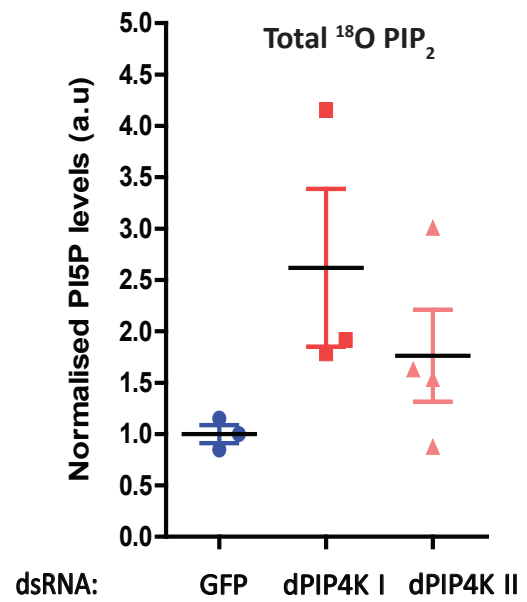

G

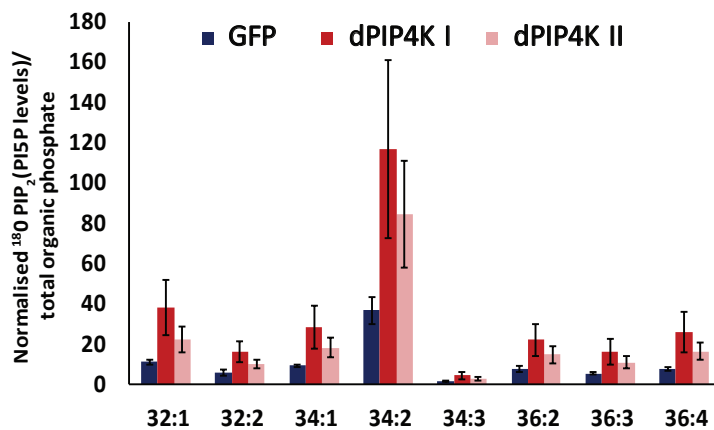

Figure 4

| <b>Parent ion mass (Q1)<br/><sup>18</sup>O-PIP<sub>2</sub> mass</b> | <b>Daughter ion mass (Q3)<br/>Diacylglycerol mass</b> | <b>Computed acyl chain<br/>length</b> |
|---------------------------------------------------------------------|-------------------------------------------------------|---------------------------------------|
| 1043.5                                                              | 547.5                                                 | 32:0                                  |
| 1045.5                                                              | 549.5                                                 | 32:1                                  |
| 1069.5                                                              | 573.5                                                 | 34:0                                  |
| 1071.5                                                              | 575.5                                                 | 34:2                                  |
| 1073.5                                                              | 577.5                                                 | 34:1                                  |
| 1093.5                                                              | 597.5                                                 | 36:5                                  |
| 1095.5                                                              | 599.5                                                 | 36:4                                  |
| 1097.5                                                              | 601.5                                                 | 36:3                                  |
| 1099.5                                                              | 603.5                                                 | 36:2                                  |
| 1101.5                                                              | 605.5                                                 | 36:1                                  |

Table 1
